# Supplementary material
Source: Elsevier journal article supplement (https://www.sciencedirect.com/science/article/pii/S2529993X21002264)
Supplement: mmc1 [file S2529993X21002264:mmc1.pdf]

## Members of the technical group for the screening of Hepatitis C virus infection

### Ministry of Health

- Pilar Aparicio. Dirección General de Salud Pública, Calidad e Innovación.
- Julia del Amo, María Vázquez, Javier Gómez, Rosa Polo y Raquel González. Plan Nacional sobre el VIH/ITS.
- María Vicenta Labrador. Unidad de Programas de Cribado.
- Isabel Pineros. Dirección General de Farmacia y Cartera Básica de Servicios.
- Marta Molina. Unidad de Sistemas de información y Documentación, Plan Nacional sobre Drogas.

### Health departments of the autonomous communities

- Carmen María Lama. Subdirección de Planificación, Derechos y Resultados en Salud, Andalucía
- María Bestué. Estrategias y Formación en la Dirección General de Asistencia Sanitaria, Aragón.
- Eduardo García-Ramos. Dirección General de Salud Pública, Canarias.
- Joan Colom. Programa de Prevención, Control y Atención al VIH, las ITS y las Hepatitis Víricas. Agencia de Salud Pública. Cataluña.
- Sara Santos. Subdirección General de Promoción, Prevención y Educación para la Salud. Comunidad de Madrid.
- Rosa Ramírez. Subdirección General de Promoción, Prevención y Educación para la Salud. Comunidad de Madrid.
- Olga Monteagudo. Servicio de Promoción y Educación para la Salud. Murcia.
- Jesús Castilla. Instituto de Salud Pública de Comunidad Foral de Navarra.
- Antonio Arraiza. Dirección de Asistencia Sanitaria de Osakidetza. País Vasco.

### Epidemiological surveillance of hepatitis C

- Ana García-Fulgueiras. Servicio de Epidemiología de la Comunidad de Murcia.
- Asunción Díaz. Centro Nacional de Epidemiología, ISCIII.

### Hepatologists

- Agustín Albillos. Hospital Universitario "Ramón y Cajal". Madrid
- María Buti. Hospital Universitario "Vall d'Hebrón". Barcelona
- Javier Crespo. Hospital Universitario "Marqués de Valdecilla". Santander
- Conrado Fernández. Hospital Universitario "Fundación Alcorcón". Alcorcón (Madrid)
- Javier García-Samaniego. Hospital Universitario "La Paz". Madrid

### Primary Care Societies

- José María Molero. Grupo de Enfermedades Infecciosas de SemFyC.
- Fernando Pérez. SEMG.
- Manuel Linares. SEMERGEN.

### Clinical Microbiologists and Infectious Diseases Specialists

- Juan Berenguer. Hospital Universitario "Gregorio Marañón". Madrid (GeSIDA).
- Miguel Ángel von Wichmann. Hospital Universitario Donostia-Biodonostia. San Sebastián (SESIDA).
- Federico García. Hospital Universitario "San Cecilio". Granada (SEIMC).

### Penitentiary institutions

- Enrique Acín. Subdirección General de Coordinación de Sanidad Penitenciaria.
- José Joaquín Antón Basanta. Centro Penitenciario "Albolote". Granada.

### Patient Associations

- Jesús Fargas. FNETH.
- Adolfo García. PLAFHC Madrid.
- Reyes Velayos. Apoyo Positivo.
- Damián Caballero. PLAFHC España.
- Juanse Hernández. GtT-VIH.
- Ramón Espacio. CESIDA.

### External Reviewers

- Jeffrey Lazarus. Instituto de Salud Global (ISG). Barcelona
- Anton Mozalevskis. Oficina Regional de la OMS para Europa
